# Supplementary material for: A six-membered-ring incorporated Si-rhodamine for imaging of copper(ii) in lysosomes
Source: Royal Society of Chemistry journal article supplement (doi:10.1039/c6ob00894a), 2016-01-01
Supplement: c6ob00894a2.pdf [file c6ob00894a2.pdf]

# Supporting Information

## A Six-Membered-Ring Incorporated Si-Rhodamine for Imaging of Copper(II) in Lysosomes

Baogang Wang,<sup>a</sup> Xiaoyan Cui,<sup>b</sup> Zhiqiang Zhang,<sup>a</sup> Xiaoyun Chai,<sup>a</sup> Hao Ding,<sup>a</sup> Qiuye  
Wu,<sup>a</sup> Zhongwu Guo,<sup>a,c\*</sup> and Ting Wang<sup>a\*</sup>

<sup>a</sup>Department of Organic Chemistry, College of Pharmacy, Second Military Medical  
University, Shanghai 200433, China

<sup>b</sup>Department of Chemistry, New York University, New York, New York 10003, USA

<sup>c</sup>Department of Chemistry, Wayne State University, 5101 Cass Avenue, Detroit,  
Michigan 48202, USA

E-mail: wangting1983927@gmail.com, zwguo@chem.wayne.edu

## **Table of Contents**

- 1. Synthesis**
- 2. X-Ray Crystallography**
- 3.  $^1\text{H}$  NMR,  $^{13}\text{C}$  NMR and HRMS Spectra**
- 4. Absorption Spectra of Probe SiRB-Cu in HEPES  
(pH = 7.4)**
- 5. The Response Mechanism of Probe SiRB-Cu  
Reacted with  $\text{Cu}^{2+}$**
- 6. Effect of pH on Fluorescence Intensity of SiR-NCS**
- 7. Absorption Spectra of Probe SiRB-Cu in HEPES  
(pH = 5.0)**
- 8. HPLC analysis of the reaction mixture of probe  
SiRB-Cu and  $\text{Cu}^{2+}$ .**
- 9. Cytotoxic effects of probe SiRB-Cu on MCF-7 cells.**
- 10. Living Cell Imaging Experiments**

# 1. Synthesis

## Synthesis of R-Cu-1

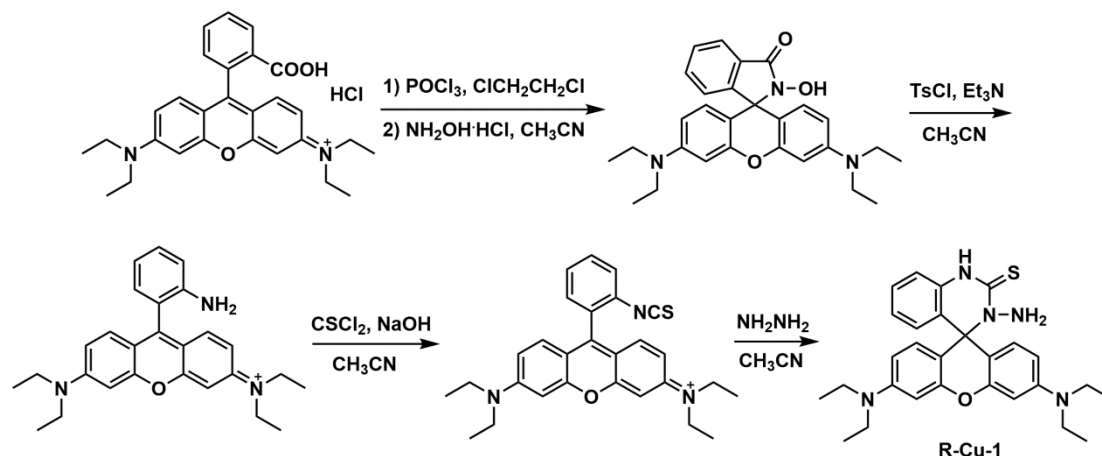

Fig. S1 Synthesis of R-Cu-1.

**R-Cu-1.** The compound was synthesized according to the reported procedure. <sup>1</sup>H NMR (600 MHz, CDCl<sub>3</sub>): δ 1.17 (t, 12H, *J* = 7.2 Hz), 3.34 (q, 8H, *J* = 7.2 Hz), 4.53 (s, 2H), 6.33-7.14 (m, 10H); <sup>13</sup>C NMR (150 MHz, CDCl<sub>3</sub>): δ 12.67, 44.37, 65.45, 97.01, 108.08, 111.46, 112.87, 123.58, 127.64, 128.15, 130.10, 130.56, 132.21, 148.68, 152.15, 171.56; HRMS (ESI) calcd. for C<sub>28</sub>H<sub>34</sub>N<sub>5</sub>OS<sup>+</sup> [M+H]<sup>+</sup>: 488.2479, found:488.2483.

## Synthesis of R-Cu-2

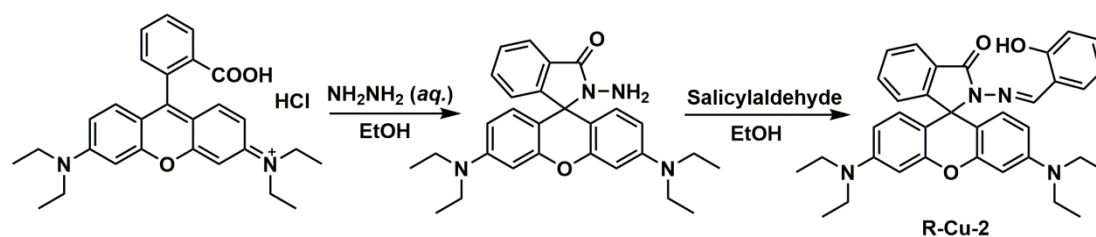

Fig. S2 Synthesis of R-Cu-2

**R-Cu-2.** The compound was synthesized according to the reported procedure. <sup>1</sup>H NMR (600 MHz, CDCl<sub>3</sub>): δ 1.17 (t, 12H, *J* = 7.2 Hz), 3.34 (q, 8H, *J* = 7.2 Hz), 4.53 (s, 2H), 6.27-8.00 (m, 14H), 9.25 (s, 1H), 10.85 (s, 1H); <sup>13</sup>C NMR (150 MHz, CDCl<sub>3</sub>): δ 12.63, 44.36, 66.50, 97.99, 105.42, 108.13, 117.00, 118.66, 118.88, 123.32, 124.20, 128.12, 128.58, 130.08, 131.45, 131.22, 133.47, 149.10, 150.76, 152.96, 153.61, 158.67, 164.23; HRMS (ESI) calcd. for C<sub>35</sub>H<sub>37</sub>N<sub>4</sub>O<sub>3</sub><sup>+</sup> [M+H]<sup>+</sup>: 561.2860, found:561.2870.

## 2. X-Ray Crystallography

**Table S1** Crystal data and structure refinement for mo\_50629a.

|                                   |                                                                                                                     |
|-----------------------------------|---------------------------------------------------------------------------------------------------------------------|
| Identification code               | mo_50629                                                                                                            |
| Empirical formula                 | C <sub>30</sub> H <sub>39</sub> Cl <sub>2</sub> N <sub>5</sub> SSi                                                  |
| Formula weight                    | 529.81                                                                                                              |
| Temperature                       | 203(2) K                                                                                                            |
| Wavelength                        | 0.71073 Å                                                                                                           |
| Crystal system                    | Triclinic                                                                                                           |
| Space group                       | P -1                                                                                                                |
| Unit cell dimensions              | a = 11.709(6) Å      α = 105.979(8)°<br>b = 17.325(10) Å     β = 103.227(9)°<br>c = 17.761(10) Å     γ = 99.347(9)° |
| Volume                            | 3273(3) Å <sup>3</sup>                                                                                              |
| Z, Density (calculated)           | 4, 1.075 Mg/m <sup>3</sup>                                                                                          |
| Absorption coefficient            | 0.160 mm <sup>-1</sup>                                                                                              |
| F (000)                           | 1136                                                                                                                |
| Crystal size                      | 0.380 x 0.210 x 0.200 mm <sup>3</sup>                                                                               |
| Theta range for data collection   | 1.245 to 25.009 °                                                                                                   |
| Index ranges                      | -11 ≤ h ≤ 13, -20 ≤ k ≤ 20, -20 ≤ l ≤ 21                                                                            |
| Reflections collected             | 18829                                                                                                               |
| Independent reflections           | 11266 [R(int) = 0.0542]                                                                                             |
| Completeness to theta = 25.242 °  | 95.2 %                                                                                                              |
| Absorption correction             | Semi-empirical from equivalents                                                                                     |
| Max. and min. transmission        | 0.746 and 0.628                                                                                                     |
| Refinement method                 | Full-matrix least-squares on F <sup>2</sup>                                                                         |
| Data / restraints / parameters    | 11266 / 84 / 678                                                                                                    |
| Goodness-of-fit on F <sup>2</sup> | 1.475                                                                                                               |
| Final R indices [I > 2σ(I)]       | R1 = 0.1530, wR2 = 0.3885                                                                                           |
| R indices (all data)              | R1 = 0.1954, wR2 = 0.4280                                                                                           |
| Extinction coefficient            | 0.0027(11)                                                                                                          |
| Largest diff. peak and hole       | 2.579 and -0.813 e.Å <sup>-3</sup>                                                                                  |

### 3. $^1\text{H}$ NMR, $^{13}\text{C}$ NMR and HRMS Spectra

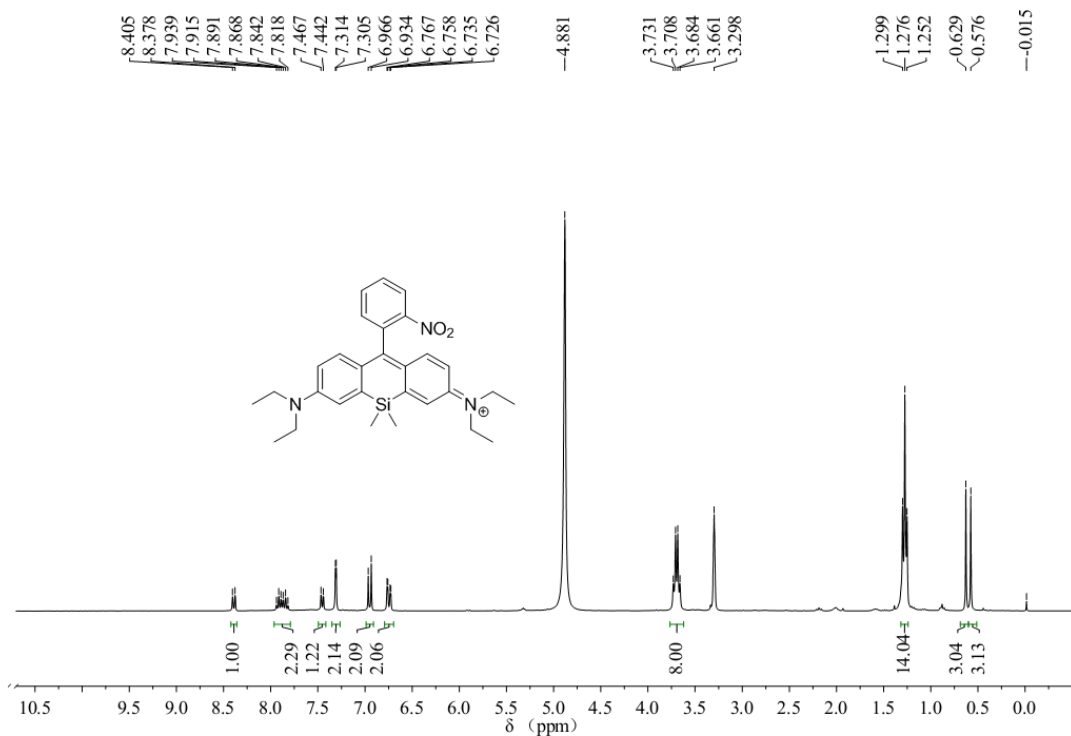

$^1\text{H}$  NMR of compound **SiR-NO<sub>2</sub>**

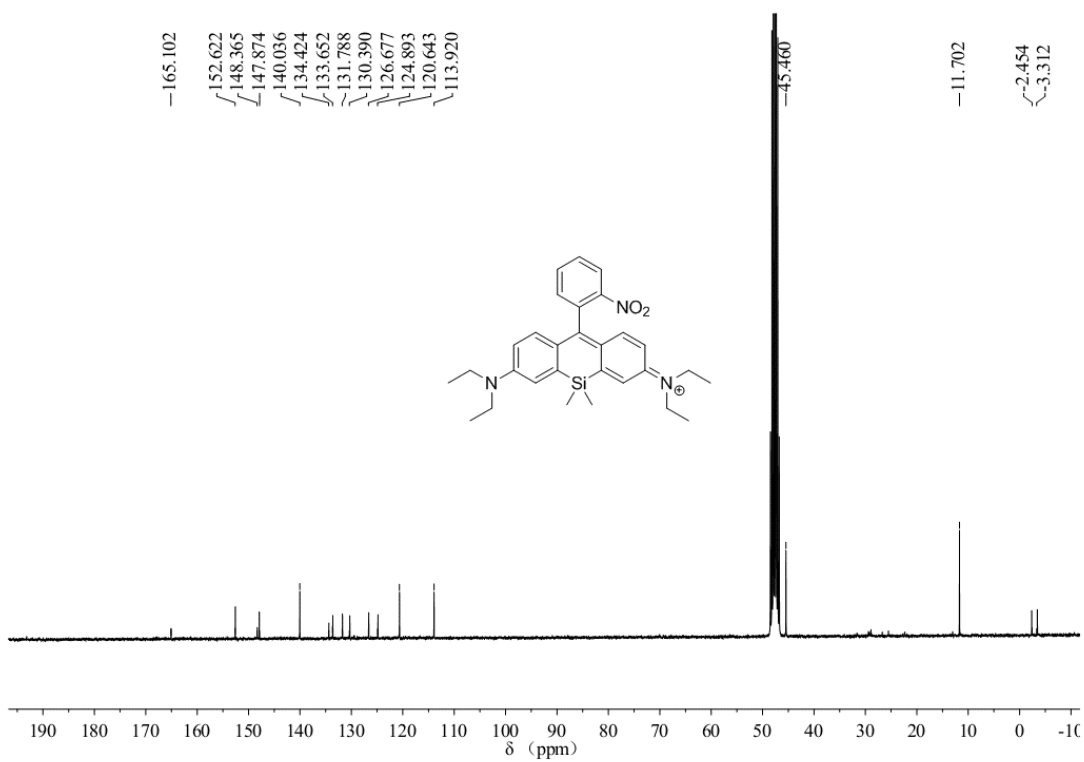

$^{13}\text{C}$  NMR of compound **SiR-NO<sub>2</sub>**

## Qualitative Analysis Report

|                        |                      |               |                      |
|------------------------|----------------------|---------------|----------------------|
| Data Filename          | WT-WBG-SIR-NO2-POS.d | Sample Name   | WT-WBG-SIR-NO2       |
| Sample Type            | Sample               | Position      | P1-E5                |
| Instrument Name        | Instrument 1         | User Name     |                      |
| Acq Method             | TEST-POS-01-WL.m     | Acquired Time | 6/25/2013 4:04:27 PM |
| IRM Calibration Status | Success              | DA Method     | Default.m            |
| Comment                |                      |               |                      |

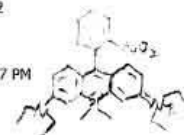

### User Spectra

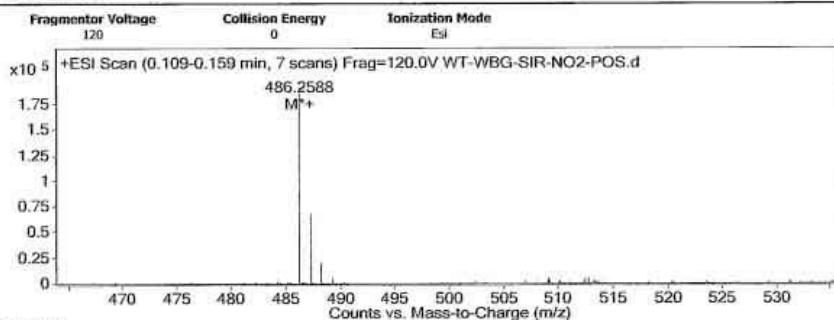

### Peak List

| m/z      | z | Abund  | Formula          | Ion |
|----------|---|--------|------------------|-----|
| 173.1654 | 1 | 182310 |                  |     |
| 274.2751 | 1 | 82935  |                  |     |
| 415.2126 | 1 | 99380  |                  |     |
| 430.1958 | 1 | 97094  |                  |     |
| 453.1683 | 1 | 52134  |                  |     |
| 458.2272 | 1 | 105415 |                  |     |
| 486.2588 | 1 | 190266 | C29 H36 N3 O2 Si | M*+ |
| 487.2612 | 1 | 68179  | C29 H36 N3 O2 Si | M*+ |
| 579.5366 | 1 | 90727  |                  |     |
| 607.5679 | 1 | 72183  |                  |     |

### Formula Calculator Element Limits

| Element | Min | Max |
|---------|-----|-----|
| C       | 3   | 50  |
| H       | 0   | 300 |
| O       | 0   | 2   |
| N       | 0   | 10  |
| Si      | 1   | 1   |

### Formula Calculator Results

| Formula          | Best | Mass     | Tgt Mass | Diff (ppm) | Ion Species      | Score |
|------------------|------|----------|----------|------------|------------------|-------|
| C29 H36 N3 O2 Si | TRUE | 486.2594 | 486.2577 | -3.53      | C29 H36 N3 O2 Si | 81.47 |

--- End Of Report ---

HRMS spectra of compound **SiR-NO<sub>2</sub>**

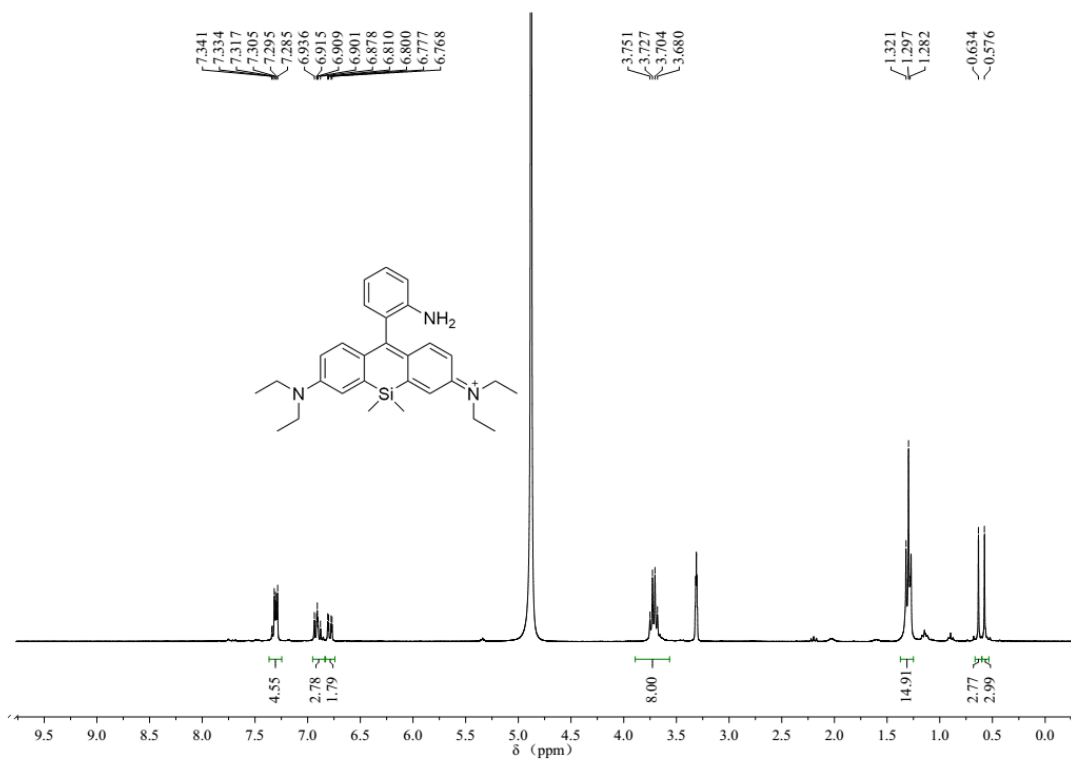

<sup>1</sup>H NMR of compound SiR-NH<sub>2</sub>

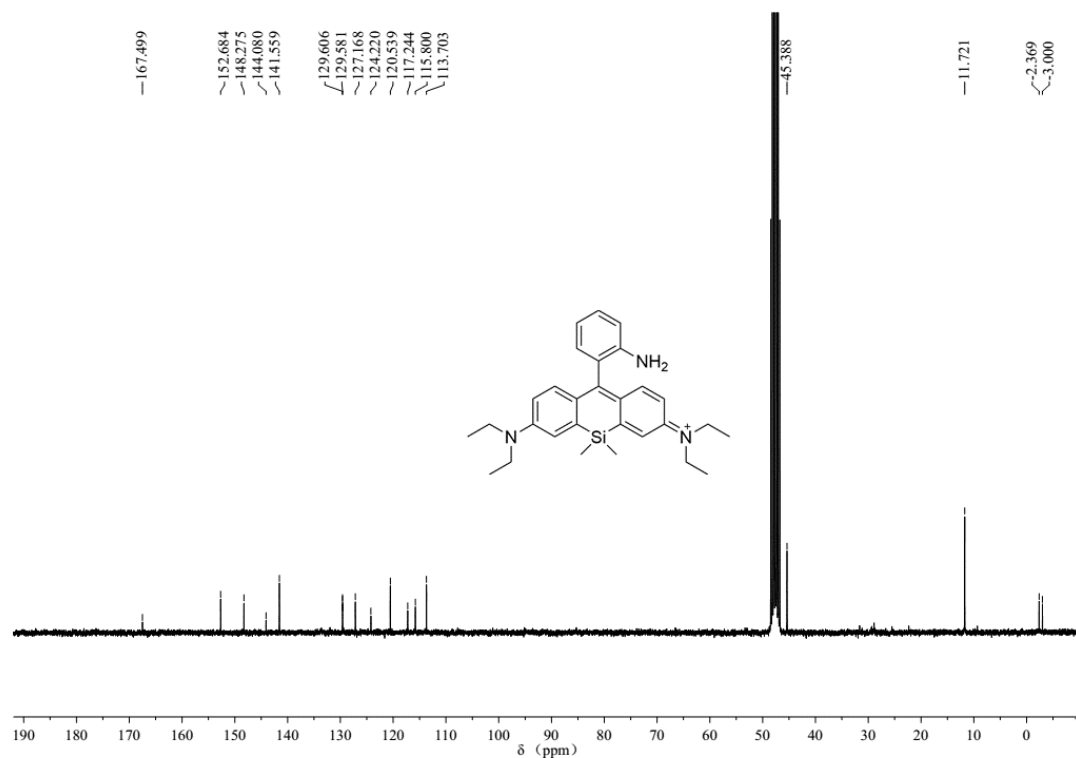

<sup>13</sup>C NMR of compound SiR-NH<sub>2</sub>

WT-WBG-SiR-NH2 #3-12 RT: 0.07-0.32 AV: 5 NL: 7.07E8  
T: + c ESI Full ms [ 50.00-1000.00]

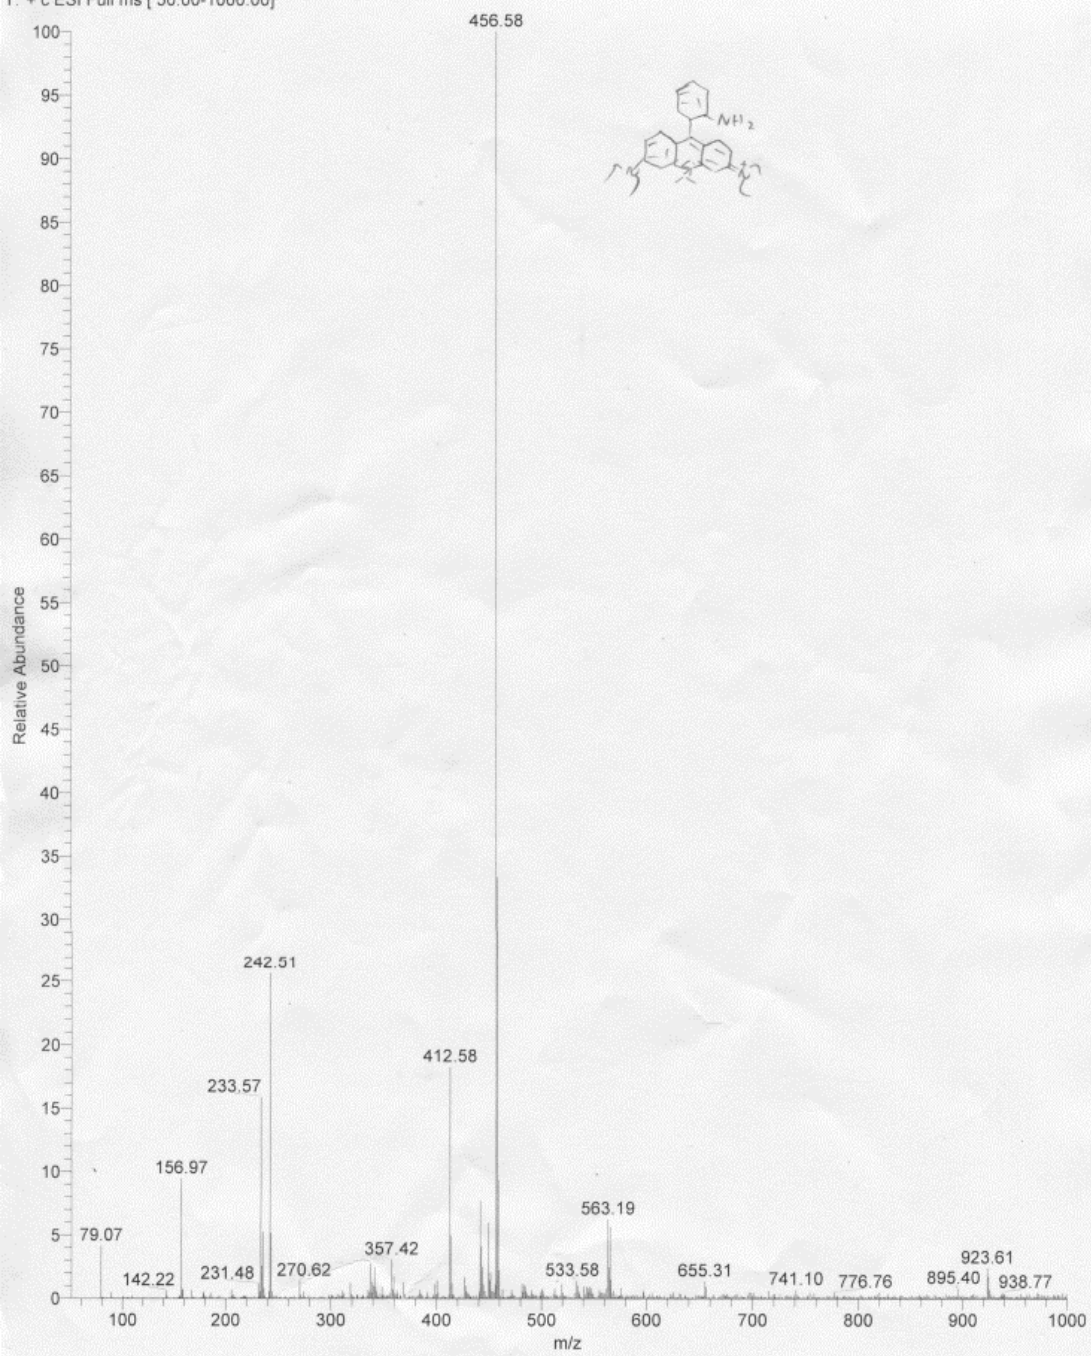

MS spectra of compound **SiR-NH<sub>2</sub>**



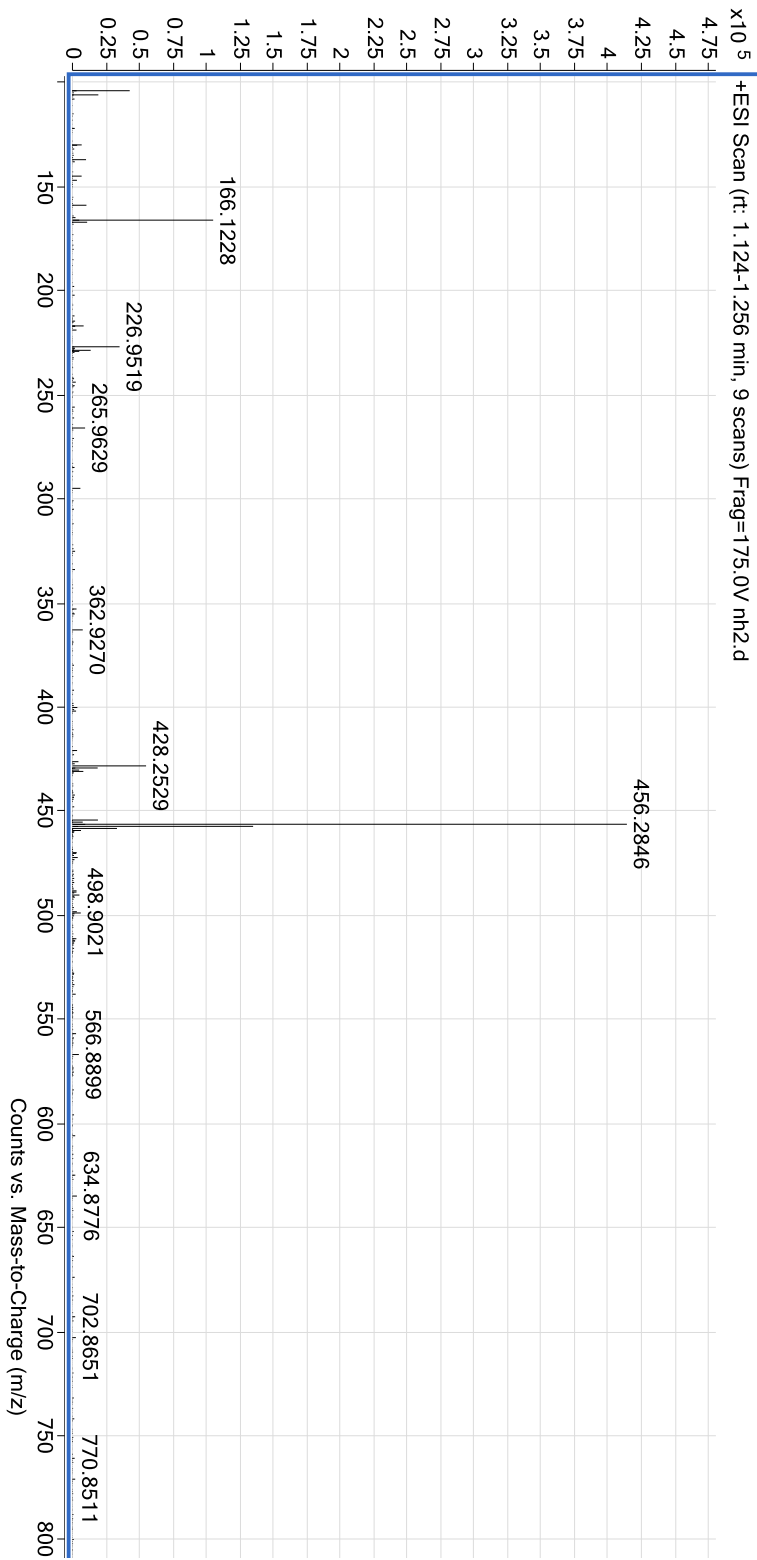

HRMS spectra of compound **SiR-NH<sub>2</sub>**

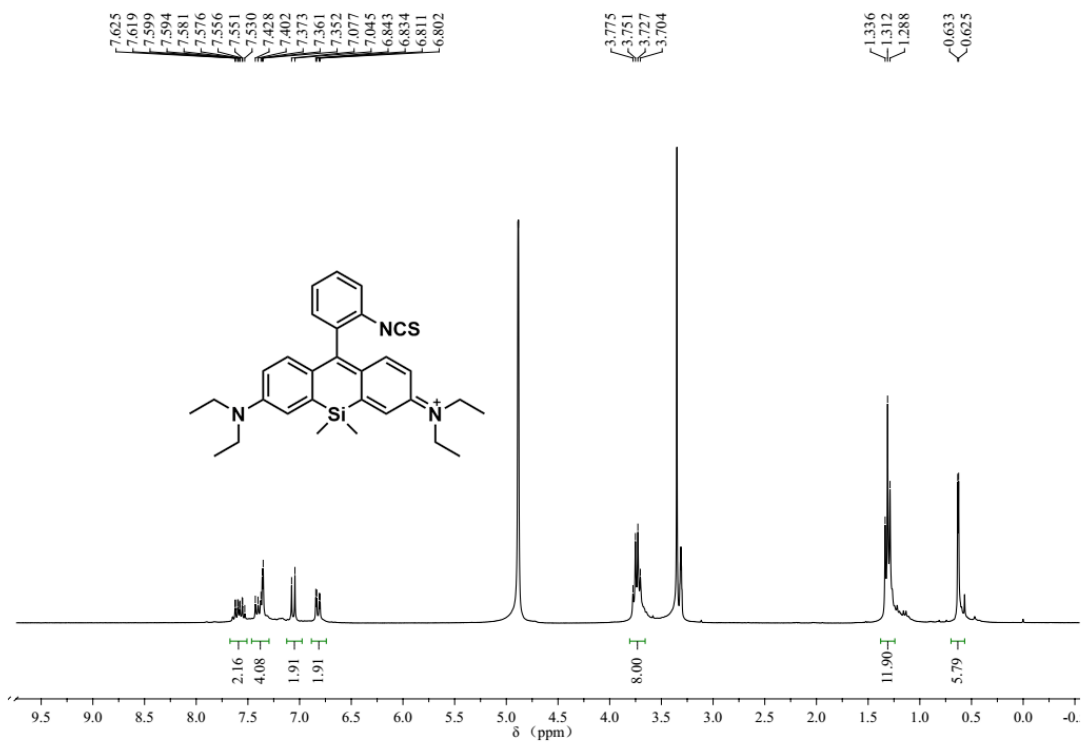

$^1\text{H NMR}$  of compound **SiR-NCS**

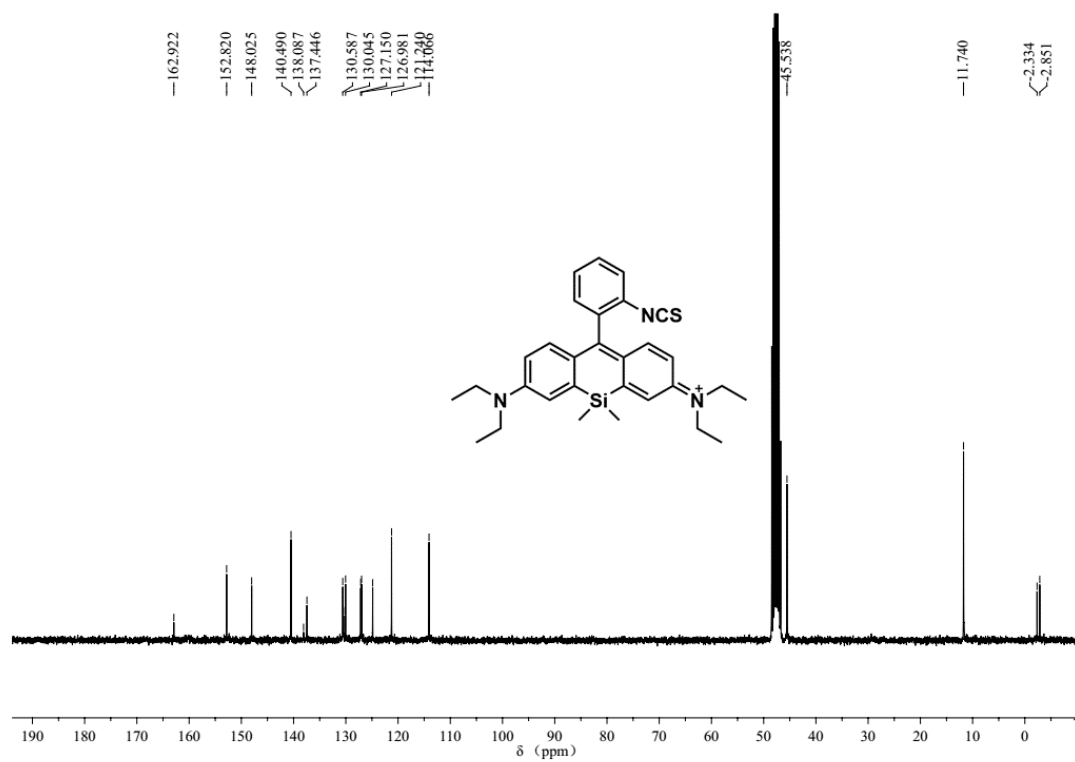

$^{13}\text{C NMR}$  of compound **SiR-NCS**

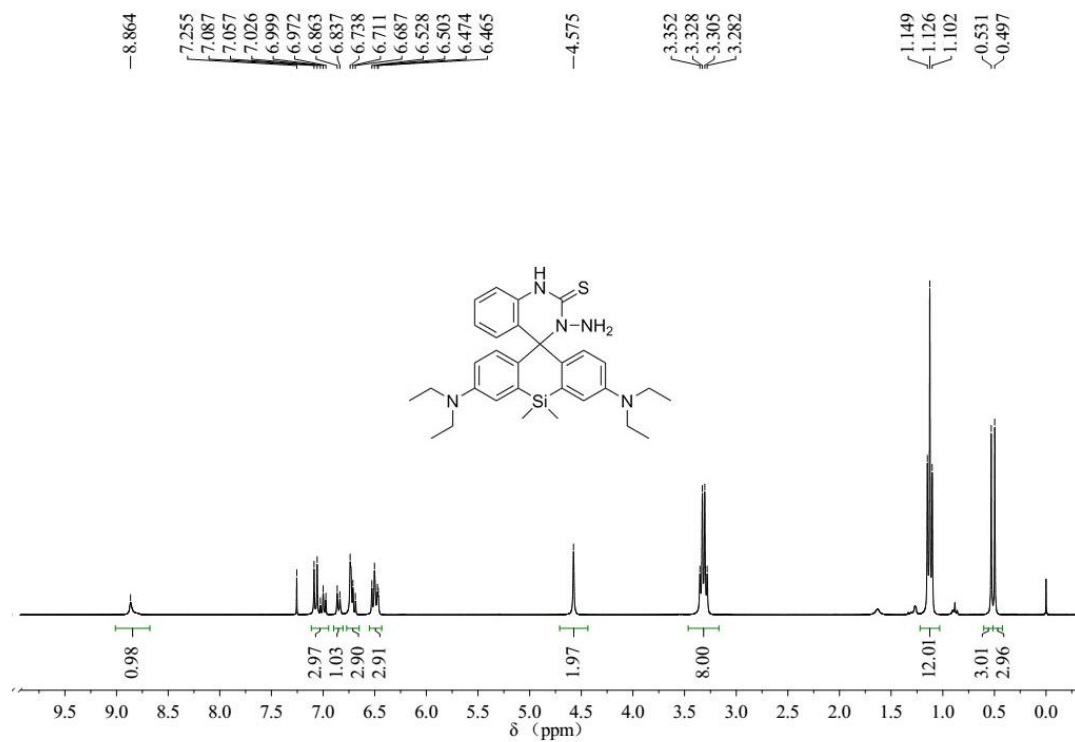

<sup>1</sup>H NMR of compound **SiRB-Cu**

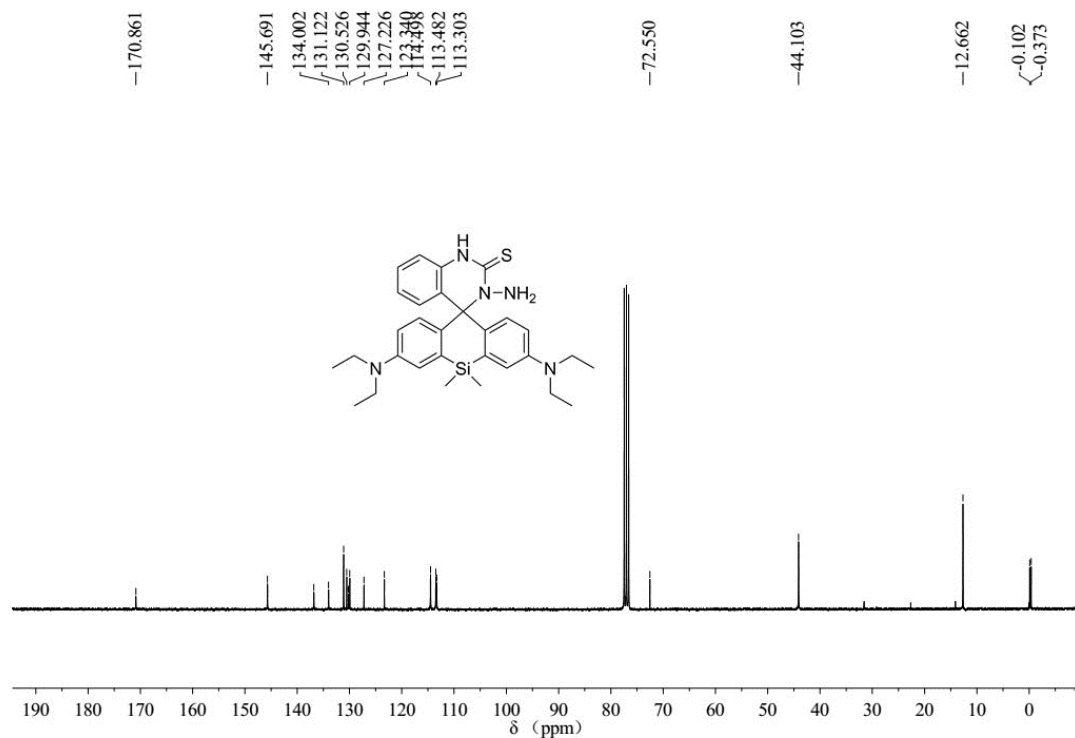

<sup>13</sup>C NMR of compound **SiRB-Cu**

## Qualitative Analysis Report

|                        |                  |               |                      |
|------------------------|------------------|---------------|----------------------|
| Data Filename          | WT-WBG-SIRB-CU.d | Sample Name   | WT-WBG-SIRB-CU       |
| Sample Type            | Sample           | Position      | P1-A1                |
| Instrument Name        | Instrument 1     | User Name     |                      |
| Acq Method             | TEST-POS-WL.m    | Acquired Time | 9/16/2015 4:58:53 PM |
| IRM Calibration Status | Success          | DA Method     | Default.m            |

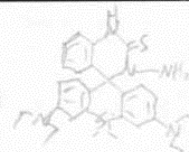

Sample Group      Info.

### User Spectra

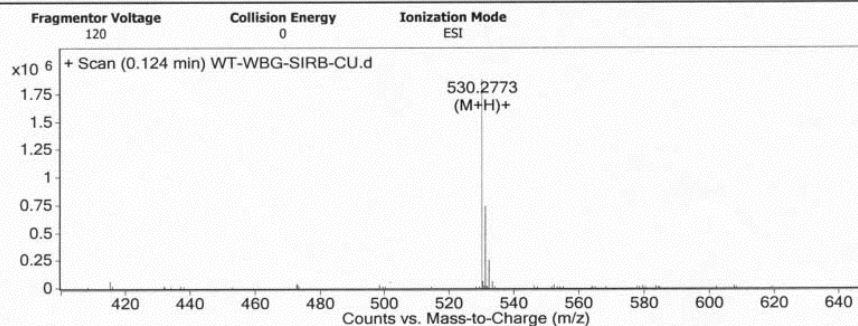

#### Peak List

| m/z      | z | Abund     | Formula         | Ion    |
|----------|---|-----------|-----------------|--------|
| 265.6447 | 2 | 5631299.5 |                 |        |
| 266.1443 | 2 | 2993447   |                 |        |
| 530.2773 |   | 1883524.5 | C30 H40 N5 S Si | (M+H)+ |

#### Formula Calculator Element Limits

| Element | Min | Max |
|---------|-----|-----|
| C       | 20  | 40  |
| H       | 0   | 600 |
| O       | 0   | 25  |
| N       | 0   | 10  |
| Si      | 0   | 1   |
| S       | 0   | 1   |

#### Formula Calculator Results

| Formula         | Best | Mass     | Tgt Mass | Diff (ppm) | Ion Species     | Score |
|-----------------|------|----------|----------|------------|-----------------|-------|
| C30 H39 N5 S Si | TRUE | 529.2701 | 529.2695 | -0.98      | C30 H40 N5 S Si | 98.27 |

--- End Of Report ---

HRMS spectra of compound **SiRB-Cu**

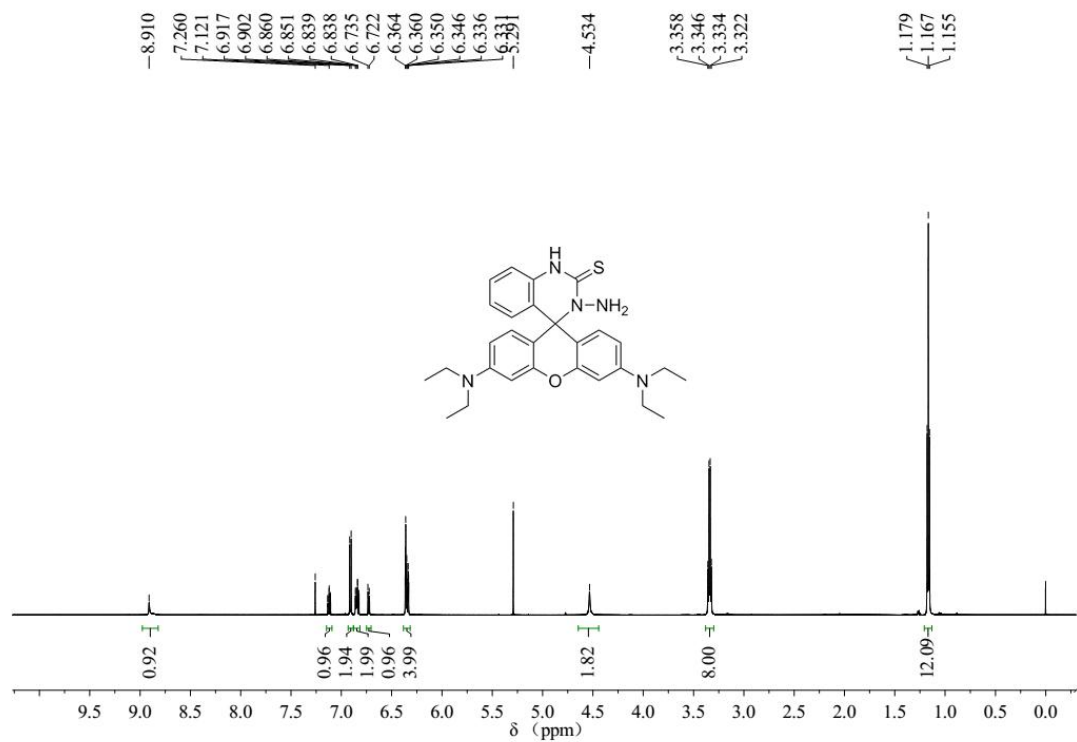

<sup>1</sup>H NMR of compound **R-Cu-1**

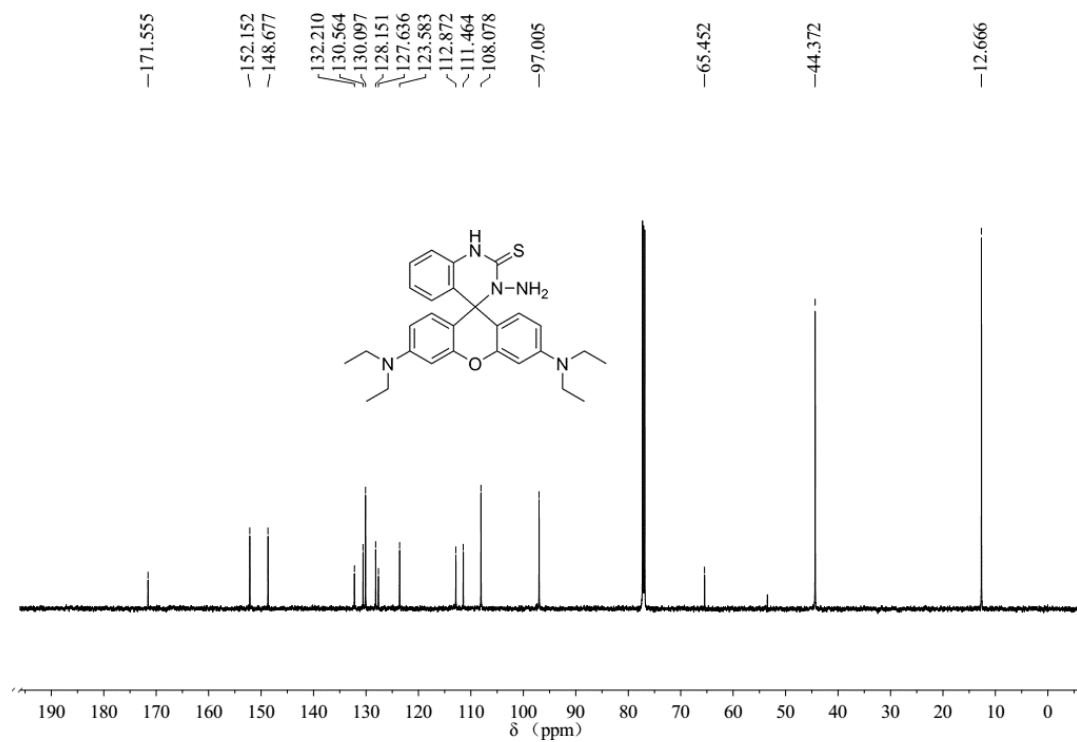

<sup>13</sup>C NMR of compound **R-Cu-1**

## Qualitative Analysis Report

|                        |                |               |                      |
|------------------------|----------------|---------------|----------------------|
| Data Filename          | wt-wbg-Rh-Cu.d | Sample Name   | wt-wbg-Rh-Cu.d       |
| Sample Type            | Sample         | Position      | P1-A1                |
| Instrument Name        | Instrument 1   | User Name     |                      |
| Acq Method             | TEST-POS-WL.m  | Acquired Time | 9/18/2015 6:14:16 PM |
| IRM Calibration Status | Success        | DA Method     | Default.m            |
| Comment                |                |               |                      |
| Sample Group           | Info.          |               |                      |

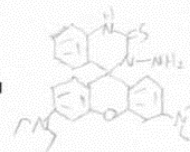

### User Spectra

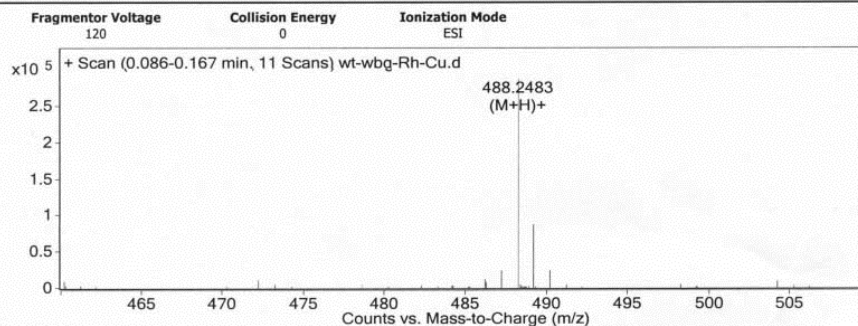

#### Peak List

| m/z      | z | Abund   | Formula        | Ion    |
|----------|---|---------|----------------|--------|
| 141.1135 |   | 48564.8 |                |        |
| 244.6296 | 2 | 72259.3 |                |        |
| 274.2744 |   | 71643.7 |                |        |
| 318.3005 |   | 37098.1 |                |        |
| 338.3423 |   | 80286   |                |        |
| 415.2122 |   | 62591.6 |                |        |
| 437.1936 |   | 38521.2 |                |        |
| 488.2483 | 1 | 287316  | C28 H34 N5 O S | (M+H)+ |
| 489.2516 | 1 | 88007.7 | C28 H34 N5 O S | (M+H)+ |
| 555.3182 |   | 45102.4 |                |        |

#### Formula Calculator Element Limits

| Element | Min | Max |
|---------|-----|-----|
| C       | 0   | 150 |
| H       | 0   | 300 |
| O       | 0   | 39  |
| N       | 0   | 43  |
| S       | 0   | 1   |

#### Formula Calculator Results

| Formula        | Best | Mass     | Tgt Mass | Diff (ppm) | Ion Species    | Score |
|----------------|------|----------|----------|------------|----------------|-------|
| C28 H33 N5 O S | TRUE | 487.2411 | 487.2406 | -0.97      | C28 H34 N5 O S | 97.91 |

--- End Of Report ---

HRMS spectra of compound **R-Cu-1**

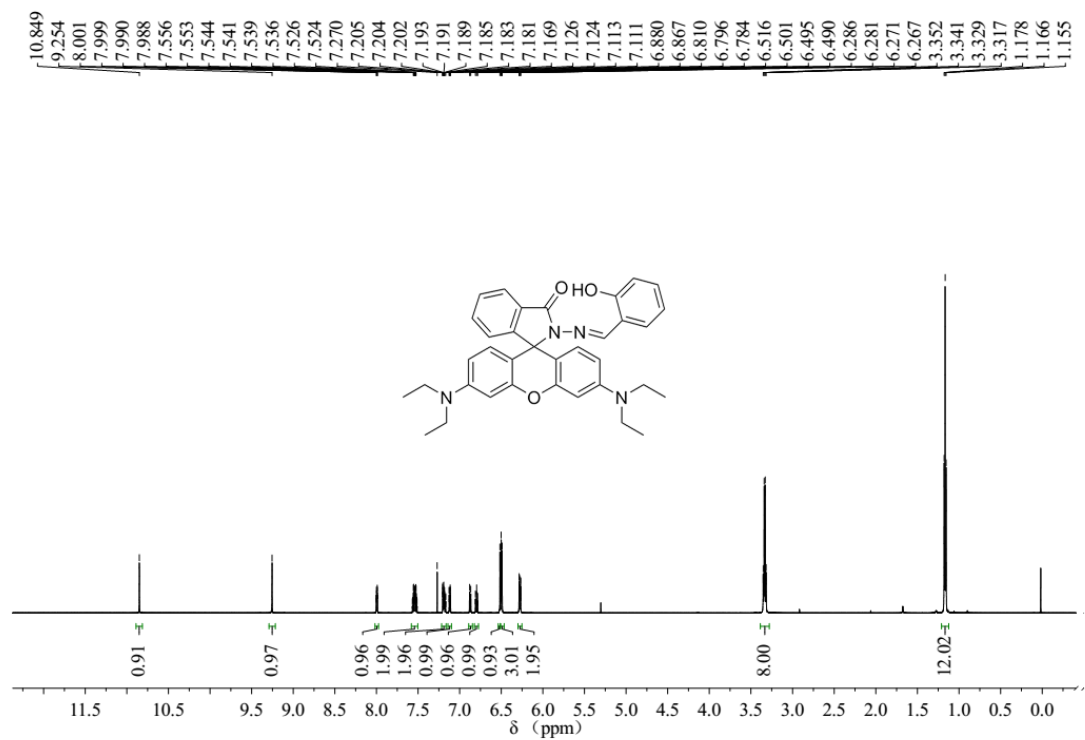

<sup>1</sup>H NMR of compound **R-Cu-2**

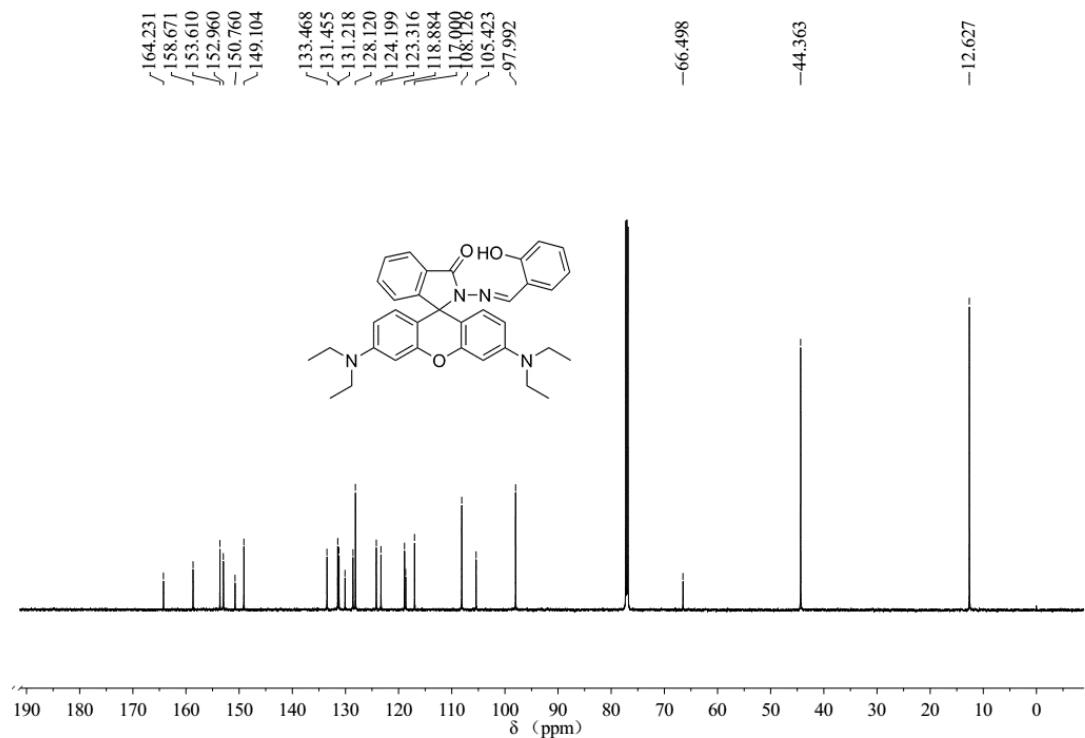

<sup>13</sup>C NMR of compound **R-Cu-2**

## Qualitative Analysis Report

|                               |                       |                      |                      |
|-------------------------------|-----------------------|----------------------|----------------------|
| <b>Data Filename</b>          | WT-WBG-Rhcu-con-POS.d | <b>Sample Name</b>   | WT-WBG-Rhcu-con      |
| <b>Sample Type</b>            | Sample                | <b>Position</b>      | P1-D1                |
| <b>Instrument Name</b>        | Instrument 1          | <b>User Name</b>     |                      |
| <b>Acq Method</b>             | TEST-POS-WL.m         | <b>Acquired Time</b> | 9/14/2015 4:36:21 PM |
| <b>IRM Calibration Status</b> | Success               | <b>DA Method</b>     | Default.m            |
| <b>Comment</b>                |                       |                      |                      |
| <b>Sample Group</b>           | <b>Info.</b>          |                      |                      |

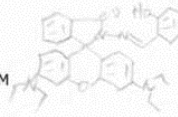

### User Spectra

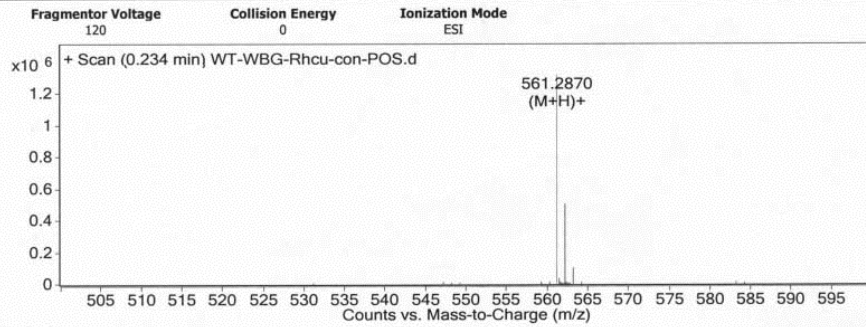

#### Peak List

| m/z      | z | Abund     | Formula       | Ion    |
|----------|---|-----------|---------------|--------|
| 281.1477 | 2 | 2177331.8 |               |        |
| 281.6491 | 2 | 886908.4  |               |        |
| 561.287  |   | 1316686.1 | C35 H37 N4 O3 | (M+H)+ |

#### Formula Calculator Element Limits

| Element | Min | Max |
|---------|-----|-----|
| C       | 3   | 330 |
| H       | 0   | 600 |
| O       | 0   | 100 |
| N       | 0   | 10  |

#### Formula Calculator Results

| Formula       | Best | Mass     | Tgt Mass | Diff (ppm) | Ion Species   | Score |
|---------------|------|----------|----------|------------|---------------|-------|
| C35 H36 N4 O3 | TRUE | 560.2797 | 560.2787 | -1.8       | C35 H37 N4 O3 | 97.92 |

--- End Of Report ---

HRMS spectra of compound **R-Cu-2**



#### 4. Absorption Spectra of Probe SiRB-Cu in HEPES (pH = 7.4)

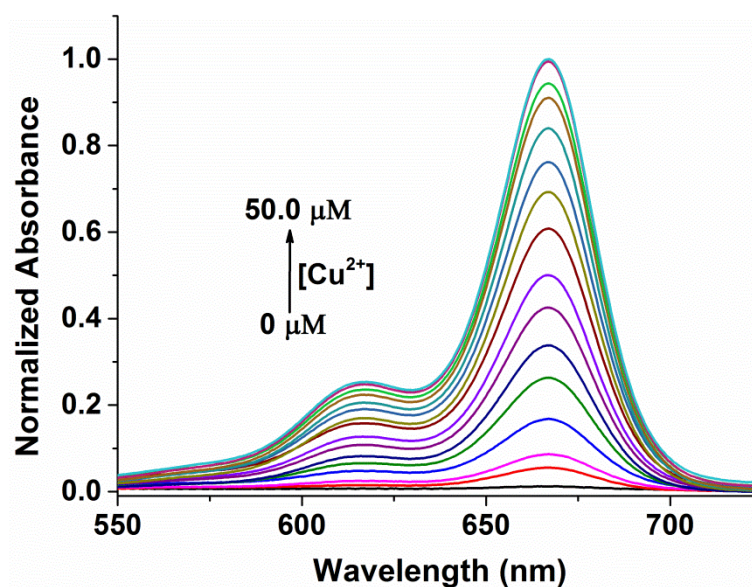

**Fig. S3** Absorption spectra of probe SiRB-Cu (2.5 μM) in the presence of different concentration of Cu<sup>2+</sup> at pH 7.4 HEPES buffer solution.

## 5. The Response Mechanism of Probe SiRB-Cu Reacted with Cu<sup>2+</sup>

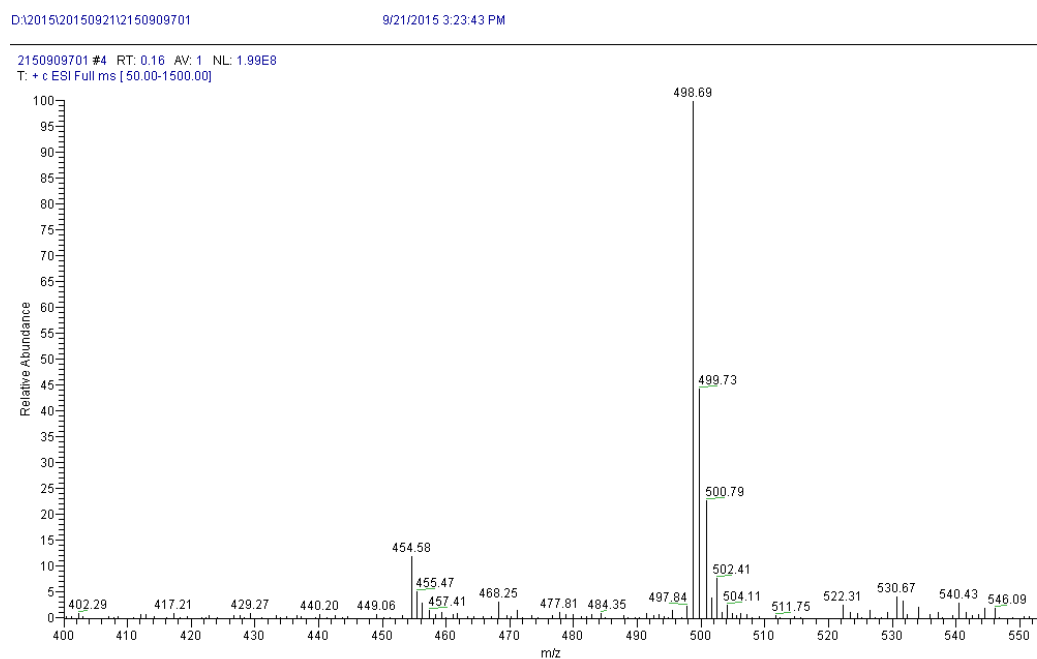

**Fig. S4.** ESI-MS of the solution which probe **SiRB-Cu** (10.0  $\mu\text{M}$ ) react with  $\text{Cu}^{2+}$  (20.0  $\mu\text{M}$ ).

## Synthesis of SiR-NCS by reaction of probe SiRB-Cu with Cu<sup>2+</sup>

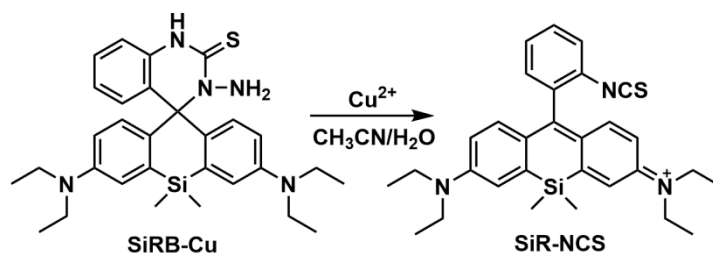

**Scheme S3** Synthesis of **SiR-NCS** by reaction of probe **SiRB-Cu** with Cu<sup>2+</sup>

**SiR-NCS.** To a solution of **SiRB-Cu** (53 mg, 0.10 mmol) in acetonitrile (10 mL), copper chloride dihydrate (51 mg) in H<sub>2</sub>O (0.5 mL) was added and the reaction mixture was stirred for 30 min at room temperature. After removal of the solvent under reduced pressure, the residue was dissolved in dichloride (15 mL). After washed with water (10 mL × 3) and dried over anhydrous Na<sub>2</sub>SO<sub>4</sub>, the solvent was removed under reduced pressure and the residue was purified by silica gel column chromatography (CH<sub>2</sub>Cl<sub>2</sub>/CH<sub>3</sub>OH, v/v, 20/1) to afford compound **SiR-NCS** as a blue solid (30 mg, 57% yield). <sup>1</sup>H NMR (600 MHz, CD<sub>3</sub>OD): δ 0.62 (s, 3H), 0.63 (s, 3H), 1.31 (t, 12H, *J* = 7.2 Hz), 3.74 (q, 8H, *J* = 7.2 Hz), 6.81-7.63 (m, 10H); <sup>13</sup>C NMR (150 MHz, CD<sub>3</sub>OD): δ -2.85, -2.34, 11.74, 45.54, 114.08, 121.25, 124.87, 126.99, 127.15, 130.05, 130.46, 130.60, 137.46, 138.10, 140.50, 148.04, 152.84, 162.95; HRMS (ESI) calcd. for C<sub>30</sub>H<sub>36</sub>N<sub>3</sub>SSi<sup>+</sup> [M]<sup>+</sup>: 498.2394, found:498.2397.

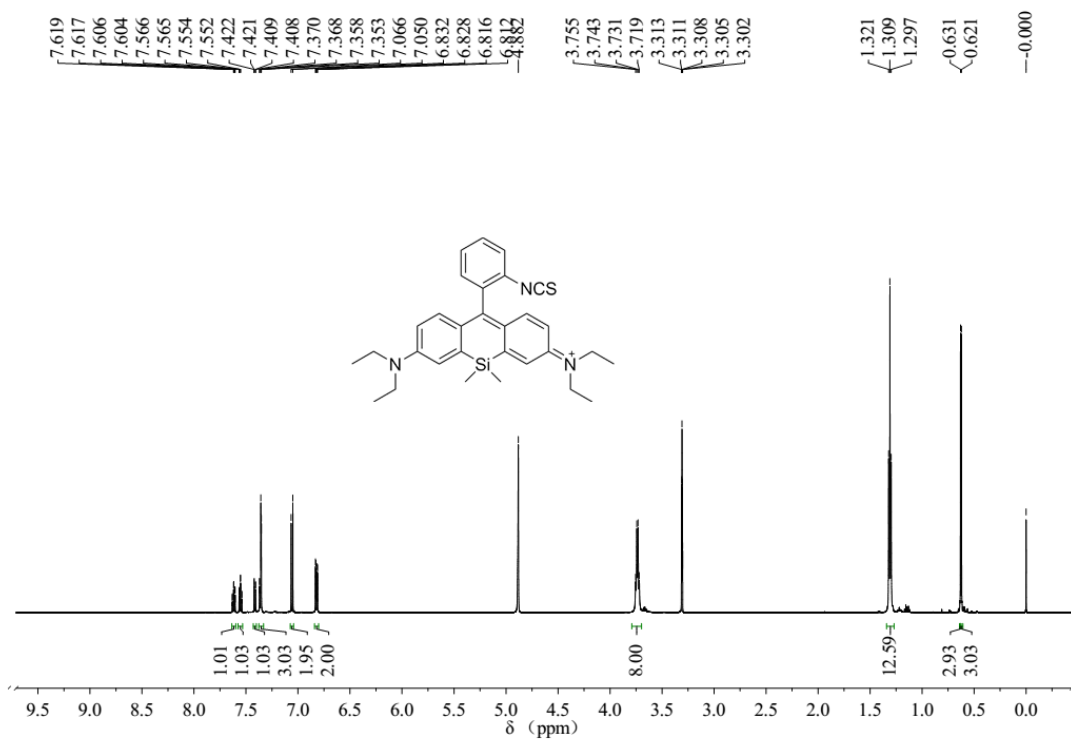

Figure S5  $^1\text{H}$  NMR of compound SiR-NCS

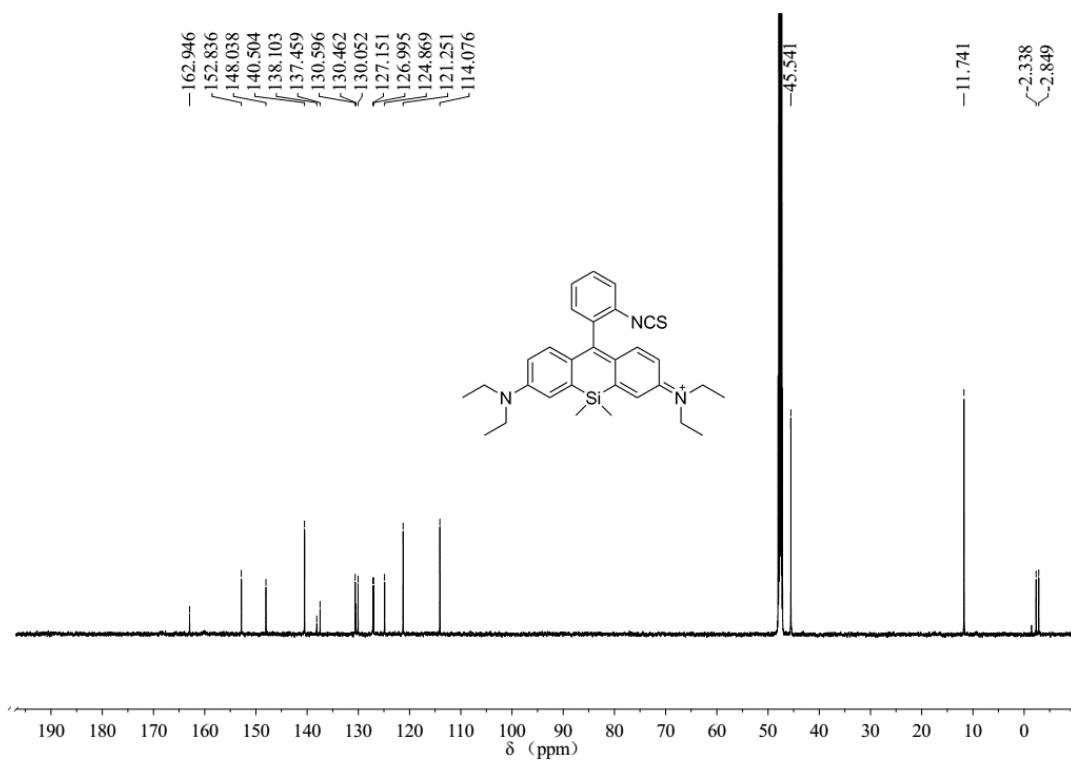

Figure S6  $^{13}\text{C}$  NMR of compound SiR-NCS

## Qualitative Analysis Report

|                        |                  |               |                      |
|------------------------|------------------|---------------|----------------------|
| Data Filename          | WT-WBG-SIR-SCN.d | Sample Name   | WT-WBG-SIR-SCN       |
| Sample Type            | Sample           | Position      | P1-D1                |
| Instrument Name        | Instrument 1     | User Name     |                      |
| Acq Method             | TEST-POS-WL.m    | Acquired Time | 7/15/2015 4:04:38 PM |
| IRM Calibration Status | Success          | DA Method     | Default.m            |

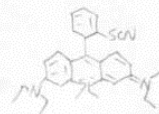

Sample Group      Info.

### User Spectra

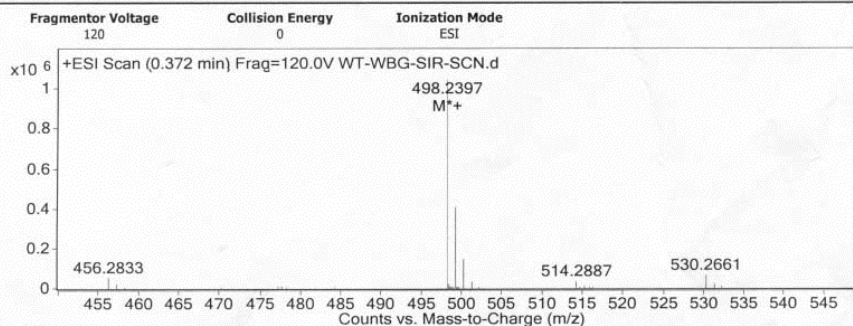

| m/z      | z | Abund     | Formula         | Ion |
|----------|---|-----------|-----------------|-----|
| 102.0133 |   | 68152.3   |                 |     |
| 116.9764 |   | 137625.1  |                 |     |
| 130.0078 |   | 513582    |                 |     |
| 143.0397 |   | 136016.3  |                 |     |
| 158.0027 | 1 | 1184670.8 |                 |     |
| 158.0591 |   | 71546.6   |                 |     |
| 179.9905 |   | 75961.6   |                 |     |
| 498.2397 | 1 | 1044865.6 | C30 H36 N3 S Si | M*+ |
| 499.2428 | 1 | 407815.7  | C30 H36 N3 S Si | M*+ |
| 500.2444 | 1 | 143466.3  | C30 H36 N3 S Si | M*+ |

#### Formula Calculator Element Limits

| Element | Min | Max |
|---------|-----|-----|
| C       | 3   | 60  |
| H       | 0   | 120 |
| N       | 0   | 8   |
| S       | 0   | 1   |
| Si      | 0   | 1   |

#### Formula Calculator Results

| Formula         | Best | Mass     | Tgt Mass | Diff (ppm) | Ion Species     | Score |
|-----------------|------|----------|----------|------------|-----------------|-------|
| C30 H36 N3 S Si | TRUE | 498.2403 | 498.2399 | -0.71      | C30 H36 N3 S Si | 94.66 |

--- End Of Report ---

**Fig. S7** HRMS spectra of compound **SiR-NCS**

## 6. Effect of pH on The Fluorescence Intensity of SiR-NCS

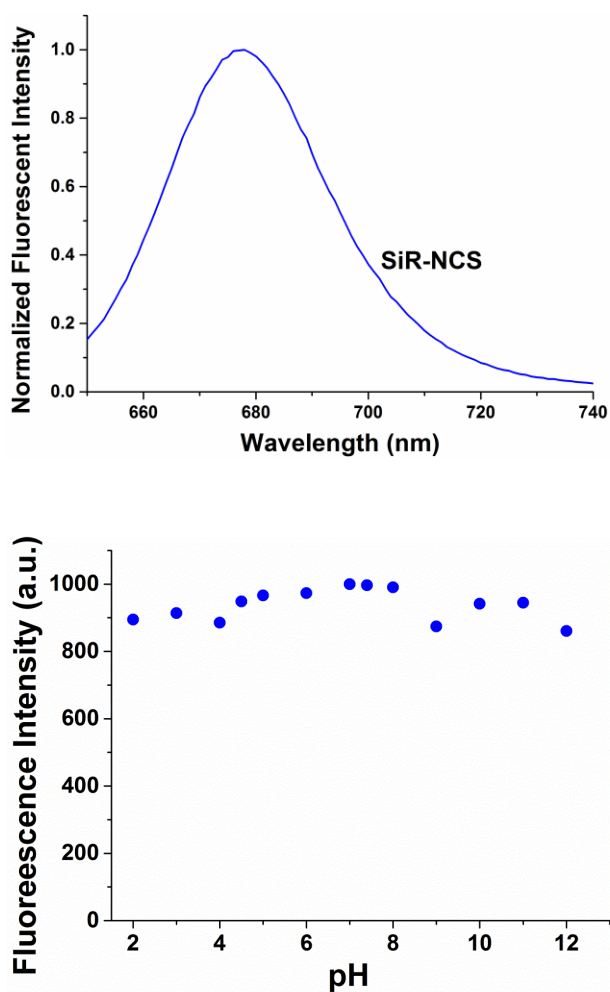

**Fig. S8.** The fluorescence emission of compound **SiR-NCS** and the effect of pH (2.0-12.0) on fluorescence intensity of **SiR-NCS** (2.5  $\mu$ M).

## 7. Absorption Spectra of Probe SiRB-Cu in HEPES (pH = 5.0)

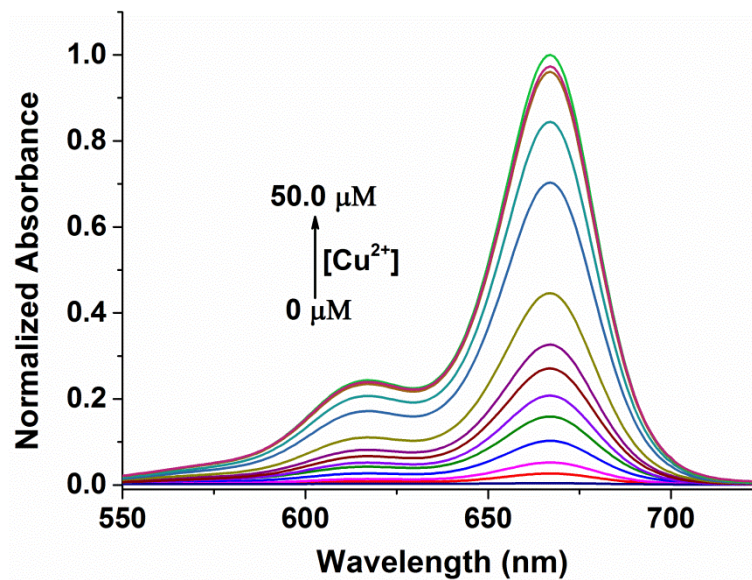

**Fig. S9.** Absorption spectra of probe SiRB-Cu (2.5 μM) in the presence of different concentrations of Cu<sup>2+</sup> at pH 5.0 HEPES buffer

## 8. HPLC Analysis of The Reaction Mixture of Probe SiRB-Cu with Cu<sup>2+</sup>.

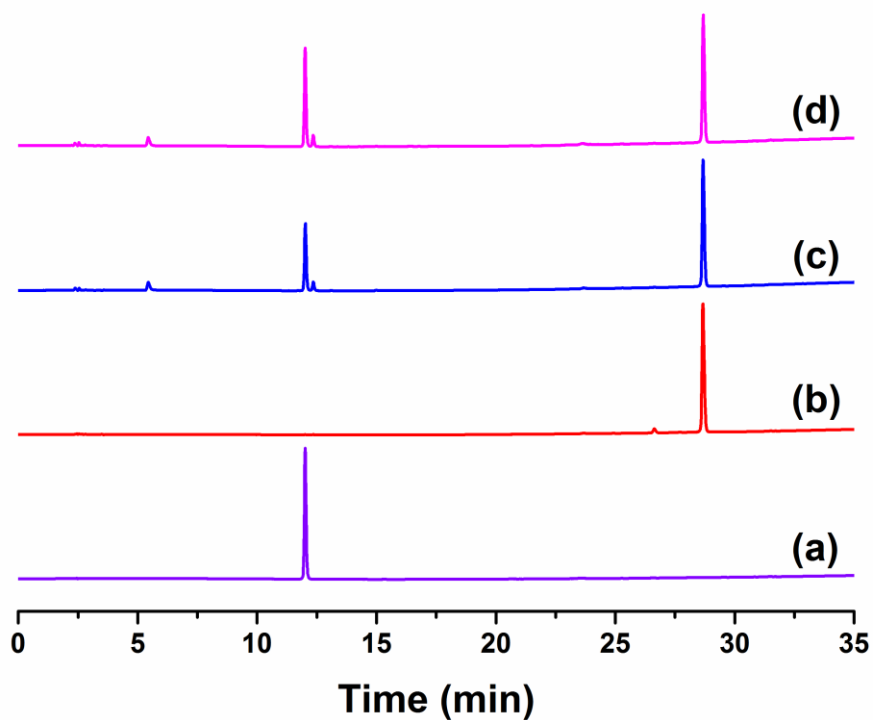

**Fig. S10.** HPLC analysis of reaction mixture of probe **SiRB-Cu** with Cu<sup>2+</sup>. (a) Probe **SiRB-Cu**; (b) Fluorescent product **SiR-NCS**; (c) the reaction mixture of probe **SiRB-Cu** and Cu<sup>2+</sup> at pH 7.4 HEPES buffer solution; (d) the reaction mixture of probe **SiRB-Cu** and Cu<sup>2+</sup> at pH 5.0 HEPES buffer solution.



## 9. Cytotoxic Effects of Probe SiRB-Cu on MCF-7 Cells.

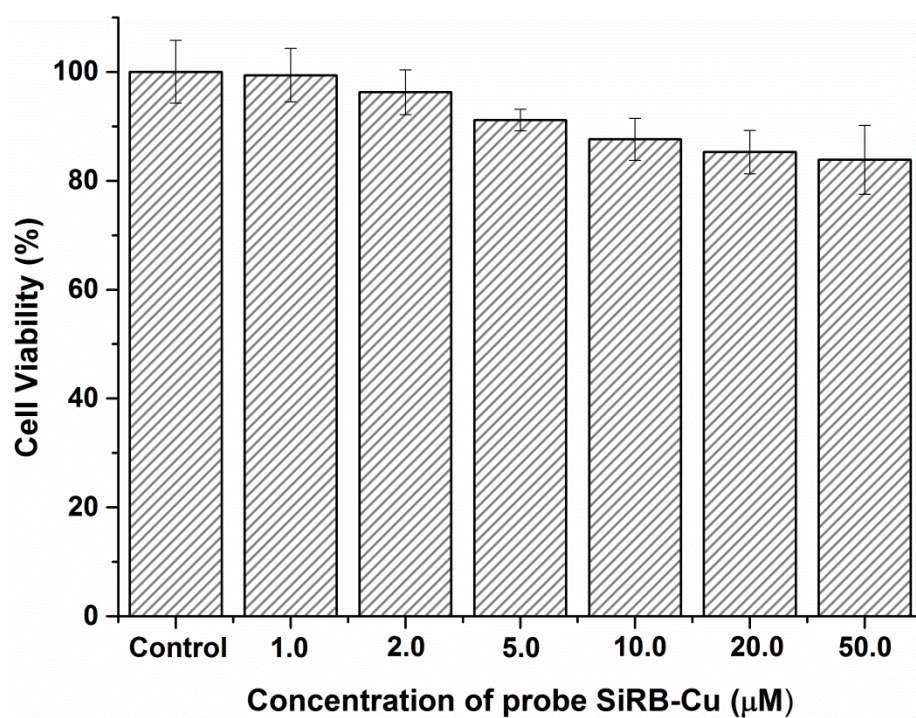

**Fig. S11.** Cytotoxic effects of probe SiRB-Cu on MCF-7 cells.

## 10. Living Cell Imaging Experiments

For co-staining experiment between probe **SiRB-Cu**, LysoTracker Green DND-26 (for lysosomal staining) or rhodamine 123 (for mitochondrion staining) and Hoechst 33342 (for nucleus staining), the cells were washed with PBS for one time and fresh culture medium containing probe **SiRB-Cu** (5.0  $\mu\text{M}$ ) was added. After incubated for 40 min, the cells were washed with fresh PBS for three times and treated with  $\text{Cu}^{2+}$  (200  $\mu\text{M}$ ) for 3 h at 37  $^{\circ}\text{C}$ . The cells were washed with PBS for three times and stained with LysoTracker Green DND-26 (1.0  $\mu\text{M}$ ) or rhodamine 123 (1.0  $\mu\text{M}$ ) and Hoechst 33342 (5.0  $\mu\text{M}$ ) for 30 min. After washed three times with fresh PBS, the cells were imaged by confocal fluorescence microscopy.

For co-staining experiment between **SiRB-Cu** and **R-Cu-2**, after the cells were washed with PBS for one time, fresh culture medium containing probe **SiRB-Cu** (5.0  $\mu\text{M}$ ) and **R-Cu-2** (5.0  $\mu\text{M}$ ) were added and the cells were incubated for 40 min. After washed with PBS for three times, the cells were further treated with  $\text{Cu}^{2+}$  for 3 h at 37  $^{\circ}\text{C}$  and stained with Hoechst 33342 (5.0  $\mu\text{M}$ ) for 30 min. After washed three times with fresh PBS, the cells were imaged by confocal fluorescence microscopy.

For co-staining experiment between **SiR-NCS** and LysoTracker Green DND-26 or rhodamine 123, after the cells were washed with PBS for one time, fresh culture medium containing **SiR-NCS** (5.0  $\mu\text{M}$ ) and LysoTracker Green DND-26 (1.0  $\mu\text{M}$ ) or rhodamine 123 (1.0  $\mu\text{M}$ ) were added and the cells were incubated for 30 min. After washed three times with fresh PBS, the cells were imaged by confocal fluorescence microscopy.

For fluorescent imaging experiment of probe **SiRB-Cu** responding to various  $\text{Cu}^{2+}$  concentrations, the cells were washed with PBS for one time and fresh culture medium containing **SiRB-Cu** (5.0  $\mu\text{M}$ ) were added. After incubated for 40 min and washed with PBS for three times, the cells were further treated with different concentrations of  $\text{Cu}^{2+}$  (0, 20.0, 50.0, 100.0, 200.0  $\mu\text{M}$ ) for 3 h. After washed three times with fresh PBS, the cells were imaged by confocal fluorescence microscopy.

To verify the effect of the addition of AA to fluorescence intensity, the cells were washed with PBS for one time and fresh culture medium containing **SiRB-Cu** (5.0  $\mu\text{M}$ ) were added. After incubated for 40 min and washed with PBS for three times, the cells were further incubated with AA (1.0 mM) for 2 h. In the control experiment, the

cells stained with probe **SiRB-Cu** (5.0  $\mu\text{M}$ ) were incubated with fresh culture medium for the same time. Then the cells were washed with PBS for three times and treated with  $\text{Cu}^{2+}$  (200.0  $\mu\text{M}$ ) for 3 h. After washed three times with fresh PBS, the cells were imaged by confocal fluorescence microscopy.

To identify the effect of addition of PDTC to fluorescence intensity, the cells were washed with PBS for one time and fresh culture medium containing **SiRB-Cu** (5.0  $\mu\text{M}$ ) were added. After incubated for 40 min and washed with PBS for three times, the cells were further incubated with PDTC (100  $\mu\text{M}$ ) for 3 h. In the control experiment, the cells stained with probe **SiRB-Cu** (5.0  $\mu\text{M}$ ) were incubated with fresh culture medium for the same time. After washed three times with fresh PBS, the cells were imaged by confocal fluorescence microscopy.

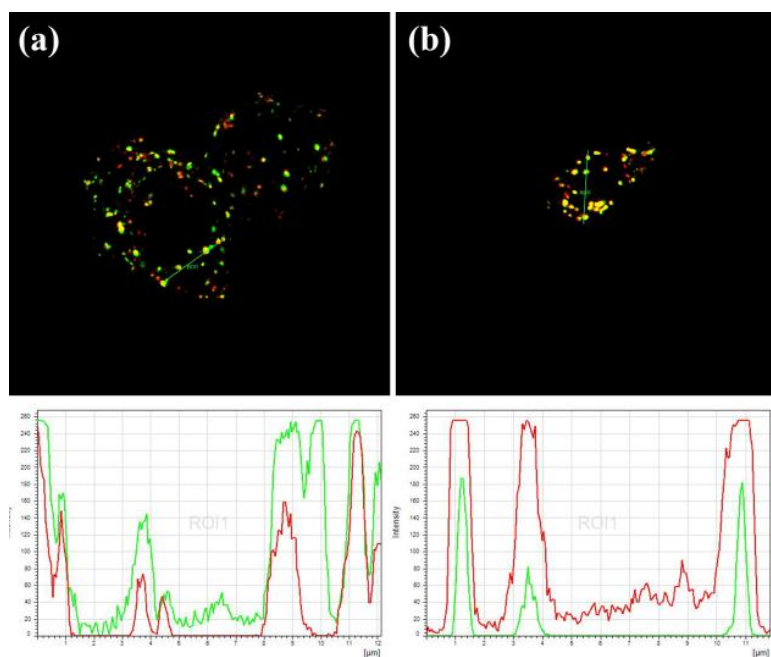

**Fig. S12** Intensity profiles of region of interest across the cells stained with  $\text{Cu}^{2+}$ -activated **SiRB-Cu** and LysoTracker Green DND-26 in (a) MCF-7 and (b) A549 cells.

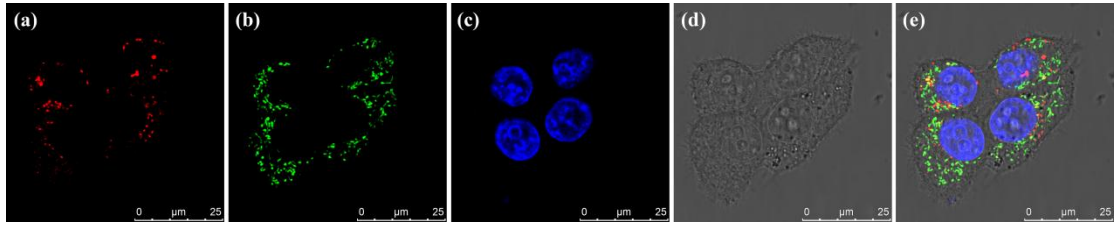

**Fig. S13** Co-staining experiments in MCF-7 cells. (a) Fluorescent image of cells incubated with probe **SiRB-Cu** ( $5.0 \mu\text{M}$ ) for 40 min and supplemented with  $\text{Cu}^{2+}$  ( $200.0 \mu\text{M}$ ) for 3 h. (b) Fluorescence image of cells incubated with R123 ( $1.0 \mu\text{M}$ ) for 20 min. (c) Fluorescence image of cells incubated with Hoechst 33342 ( $5.0 \mu\text{M}$ ) for 20 min. (d) DIC image. (e) Overlay image of panel (a), (b) (c) (d) and (e).

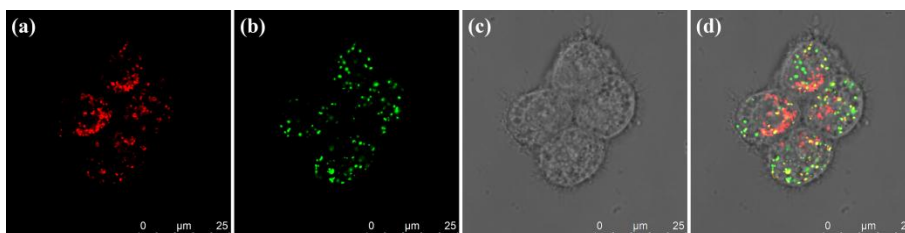

**Fig. S14** Co-staining experiments in MCF-7 cells. (a) Fluorescent images of cells incubated with probe **SiR-NCS** ( $5.0 \mu\text{M}$ ) for 40 min. (b) Fluorescence image of cells incubated with LysoTracker Green DND-26 ( $1.0 \mu\text{M}$ ) ( $1.0 \mu\text{M}$ ) for 20 min. (c) DIC images. (d) Overlay image of panel (a), (b) and (c).

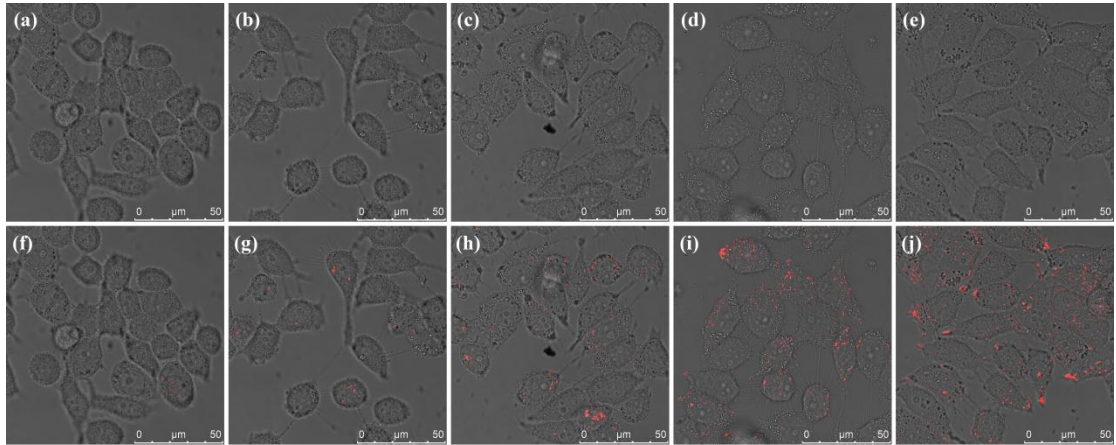

**Fig. S15** DIC images (a-e) and overlay images (f-j) of MCF-7 cells incubated with probe **SiRB-Cu** ( $5.0 \mu\text{M}$ ) after supplemented with different  $\text{Cu}^{2+}$  concentration (0, 20.0, 50.0, 100.0, 200.0  $\mu\text{M}$ ) for 3.0 h.
